# Supplementary material for: Anticancer activity of a thymidine quinoxaline conjugate is modulated by cytosolic thymidine pathways
Source: Springer Nature journal article supplement (doi:10.1186/s12885-015-1149-5), 2015-03-20

tumor tissue

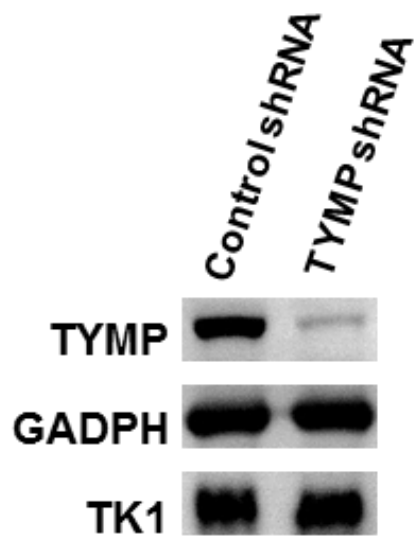

Supplement: MOESM3 [file 9744086]
